# Supplementary material for: Different LED Light Wavelengths and Photosynthetic Photon Flux Density Effect on Colletotrichum acutatum Growth
Source: MDPI journal article supplement (doi:10.3390/plants11010143), 2022-01-05
Supplement: s1 [file s1]

**Table S1.** Correlation matrix (Pearson (n)) at 50  $\mu\text{mol m}^{-2}\text{s}^{-1}$ 

| Variables | 1 DAI        | 2 DAI        | 3 DAI        | 4 DAI        |
|-----------|--------------|--------------|--------------|--------------|
| 1 DAI     | <b>1</b>     | 0.246        | 0.043        | <b>0.541</b> |
| 2 DAI     | 0.246        | <b>1</b>     | <b>0.392</b> | <b>0.532</b> |
| 3 DAI     | 0.043        | <b>0.392</b> | <b>1</b>     | 0.237        |
| 4 DAI     | <b>0.541</b> | <b>0.532</b> | 0.237        | <b>1</b>     |

Values in bold are different from 0 with a significance level  $\alpha=0.05$

**Table S2.** Correlation matrix (Pearson (n)) at 100  $\mu\text{mol m}^{-2}\text{s}^{-1}$ 

| Variables | 1 DAI        | 2 DAI        | 3 DAI    | 4 DAI        |
|-----------|--------------|--------------|----------|--------------|
| 1 DAI     | <b>1</b>     | <b>0.630</b> | -0.246   | <b>0.614</b> |
| 2 DAI     | <b>0.630</b> | <b>1</b>     | 0.055    | <b>0.561</b> |
| 3 DAI     | -0.246       | 0.055        | <b>1</b> | -0.078       |
| 4 DAI     | <b>0.614</b> | <b>0.561</b> | -0.078   | <b>1</b>     |

Values in bold are different from 0 with a significance level  $\alpha=0.05$

**Table S3.** Correlation matrix (Pearson (n)) at 200  $\mu\text{mol m}^{-2}\text{s}^{-1}$ 

| Variables | 1 DAI        | 2 DAI        | 3 DAI        | 4 DAI        |
|-----------|--------------|--------------|--------------|--------------|
| 1 DAI     | <b>1</b>     | <b>0.532</b> | <b>0.653</b> | <b>0.604</b> |
| 2 DAI     | <b>0.532</b> | <b>1</b>     | <b>0.835</b> | <b>0.807</b> |
| 3 DAI     | <b>0.653</b> | <b>0.835</b> | <b>1</b>     | <b>0.728</b> |
| 4 DAI     | <b>0.604</b> | <b>0.807</b> | <b>0.728</b> | <b>1</b>     |

Values in bold are different from 0 with a significance level  $\alpha=0.05$
